# Supplementary material
Source: Springer Nature journal article supplement (https://www.springermedizin.de/resource/supplementary/12958_2009_691_MOESM4_ESM.pdf/9568596)

(A)

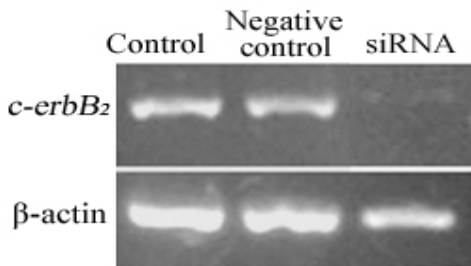

(B)

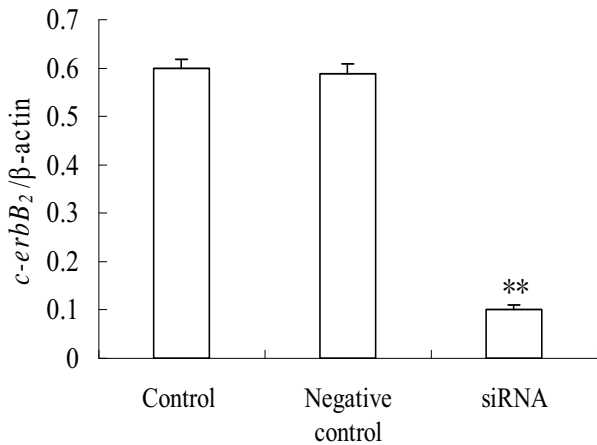

Supplement: MOESM4 [file 9568596]
